# Supplementary material for: Amino acid inspired tunable superparamagnetic iron oxide (SPION) nanostructures with high magnetic hyperthermia potential for biofunctional applications
Source: Royal Society of Chemistry journal article supplement (doi:10.1039/c9nj05343c), 2020-01-01
Supplement: c9nj05343c1.pdf [file c9nj05343c1.pdf]

## Supplementary Information

### Aminoacid Inspired Tunable Superparamagnetic Iron oxide (SPION) Nanostructures with High Magnetic Hyperthermia Potential as Biofunctional Magnetic Probes

Ananjana K.,<sup>a</sup> Swetha S.,<sup>b</sup> Prabha Prakash,<sup>c</sup> K. V. Nishad,<sup>d</sup> Manoj Komath,<sup>d</sup> Balagopal N. Nair,<sup>e,f</sup> Sailaja G. S.\*<sup>a</sup>

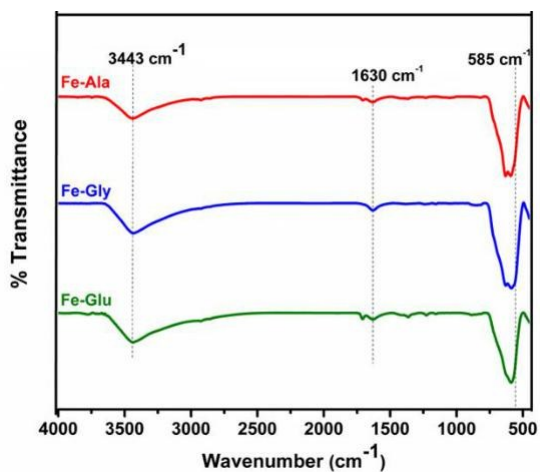

Fig. S1 FTIR spectra of SPION-AA

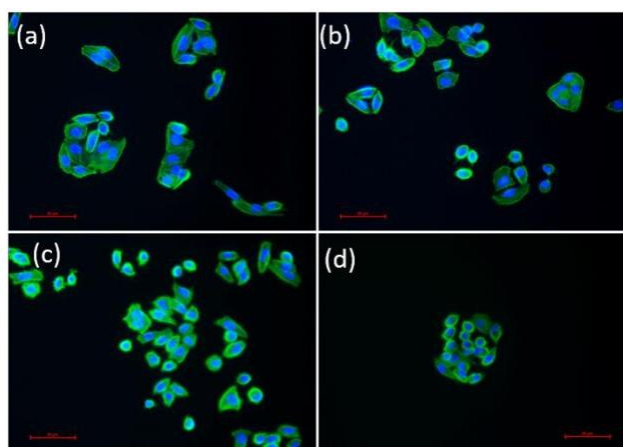

Fig. S2 Fluorescence microscopic images of the cytoskeleton of untreated HeLa cells (a), after incubating with Fe-Ala, Fe-Gly and Fe-Glu (b,c and d respectively) for 3h.

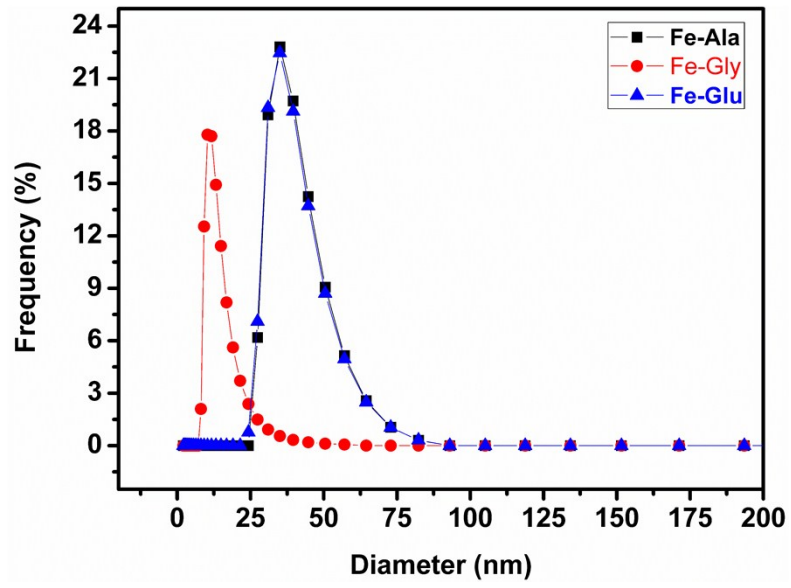

Fig. S3 Particle size distribution of SPION-AA samples with Fe:AA ratio 1:0.1 by Dynamic Light Scattering (DLS)
